# Supplementary material
Source: Research Square preprint supplement (doi:10.21203/rs.3.rs-10135800/v1)
Supplement: Supplementary file 1 [file 8c6c7c2a1853995088fa4ae3.docx]

**Single-cell RNA sequencing of organ-specific endothelial landscapes and intercellular networks in endocrine organs**

Jae Woo Mo1, Dong Hwa Choi2, Yea Eun Kang3, Sun Wook Cho2,4, Young Joo Park4,5,6, Junil Kim1,7#, Yoo Hyung Kim2,6#

1Department of Bioinformatics, Soongsil University, Seoul, Korea

2Department of Internal Medicine, Seoul National University Hospital, Seoul, Korea

3Department of Internal Medicine, Chungnam National University, Daejeon, Korea

4Department of Internal Medicine, Seoul National University, Seoul, Korea

5Department of Internal Medicine and Genomic Medicine Institute, Medical Research Center, Seoul National University College of Medicine, Seoul, Korea.

6Department of Molecular Medicine and Biopharmaceutical Sciences, Graduate School of Convergence Science and Technology, Seoul National University, Seoul, Korea.

7School of Systems Biomedical Science, Soongsil University, Seoul, Republic of Korea

#These authors contributed equally as co-corresponding authors.

Running title : Endothelial heterogeneity in the endocrine organs

**Supplementary Methods**

**Mice and Tissue Collection**

Specific pathogen free (SPF) C57BL6/J mice were purchased from Orient Bio (Seongnam, Korea) and maintained in our SPF at Seoul National University. Mice were provided ad libitum access to standard laboratory diet and water. All experiments were performed using 6- to 8-week-old male mice. We collected six organs for analysis; the thyroid, adrenal gland, pituitary gland, and kidney-representing tissues with continuous fenestrated ECs; the liver-characterized by sinusoidal ECs; and the brain cortex-containing continuous non-fenestrated ECs. For the thyroid, samples from eight mice were sufficient to obtain the required number for scRNA-seq analysis, while samples from six mice were sufficient for the adrenal gland. No randomization or stratification strategies were applied, and blinding was not performed at any stage of the study.

**Details for Tissue Dissociation and Sample Preparation**

Each organ was surgically excised and immediately placed in phosphate-buffered solution (PBS) supplemented with 5% fetal bovine serum (FBS; US ORIGIN, S1480-500). Dissected tissues were transferred to a chilled Petri dish on ice and finely minced with a scalpel. The minced tissue was enzymatically digested in PBS with 5% FBS solution containing collagenase IV (Roche, 1108882001), collagenase V (Sigma, D5025) and DNase (Sigma, DN25) at 37 °C for 20 minutes. Thereafter, tissues were mechanically dissociated by gentle pipetting using a serological pipette. To facilitate cell dispersion, 5 μL of 0.5 M EDTA (Invitrogen, 15575020) was added, followed by gentle pipetting with a 1 mL pipette. The resulting cell suspension was filtered through a 70 µm cell strainer (SPL) into a 50 mL conical tube prefilled with 30 mL of PBS. After adjusting the volume to 50 mL, cells were centrifuged at 1300 rpm for 5 minutes at room temperature. The cell pellet was resuspended in PBS with 5% FBS.

**Library Preparation and Sequencing**

Single cell suspensions were resuspended in PBS containing 0.04% ultra-pure BSA. scRNA-seq libraries were prepared using the Chromium Single Cell 3′ Reagent Kits v3 (10x Genomics; Pleasanton, CA, USA) according to the manufacturer’s instructions. The aimed target cell recovery for each library was 10 000. Generated libraries were sequenced on an Illumina HiSeq4000.

**Mapping and Quality Control of scRNA-seq Data**

Raw sequencing data were mapped to the gex-mm10-2020-A reference genome using the Cell Ranger pipeline (v7.1.0). To eliminate background and ambient RNA contamination, the CellBender remove-background algorithm was applied to the count matrices generated by Cell Ranger. Quality control filtering was performed by excluding cells with fewer than 200 detected genes, which were considered likely empty droplets. Cells with more than 8 000 detected genes or more than 50 000 total UMI counts were presumed to be doublets or multiplets and excluded from further analysis. Cells with more than 30% mitochondrial gene content were also removed. For liver samples, an adjusted threshold of 50% mitochondrial gene content was applied, based on thresholds used in prior studies, which reflect the inherently higher mitochondrial transcript abundance in hepatocytes. Subsequent data processing and analyses were conducted using the Scanpy package (v1.11.5). Scrublet (v0.2.3) was employed to identify and exclude doublets based on transcriptional profiles.

**Data integration and cell type annotation**

Filtered count matrices were subjected to normalization and log-transformation prior to downstream analysis. Highly variable genes (HVGs) were identified using Scanpy with the sample identity provided as a batch key, yielding a batch-aware set of HVGs across endocrine organ samples. The expression matrices were then scaled, followed by principal component analysis (PCA) using 50 components. To mitigate sample-specific effects across endocrine organs, these principal components were first adjusted using ridge regression implemented in the BBKNN package, and batch-balanced k-nearest neighbor graphs were subsequently constructed with BBKNN (v1.6.0). These graphs served as the foundation for computing low-dimensional representations with Uniform Manifold Approximation and Projection (UMAP), and cell populations were subsequently clustered using the Leiden algorithm. After clustering, cell lineages were assigned based on the expression patterns of canonical marker genes. Tissue-specific epithelial populations were further annotated using organ-specific epithelial marker genes. Specifically, epithelial cells from the adrenal gland were characterized by expression of *Cyp11b1*, *Agtr1b*, and *Star*; kidney-specific epithelial cells expressed *Slc5a2* and *Slc22a30*; and those from the pituitary gland were marked by *Esr1, Gh, Fam155a*, and *Pou1f1*.

**Endothelial subclustering**

Endothelial cells were defined in the global atlas and then subset for downstream subclustering. PCA was recomputed on the normalized, log-transformed expression matrix within the endothelial subset, and sample-specific batch effects were corrected in the PCA space using Harmonypy (v0.0.10). k-nearest neighbor graphs were then constructed from the Harmony-corrected embeddings and used to compute UMAP embeddings and Leiden clusters that defined endothelial subtypes (Supplementary Fig. 4a). Endothelial subclusters were annotated on the basis of canonical endothelial marker gene expression.

**Definition of capillary endothelial states**

For Figure 2, cECs were further assigned to fenestrated, continuous non-fenestrated or sinusoidal cEC categories according to their organ of origin, reflecting the known microvascular architecture of endocrine organs. Specifically, cECs from the thyroid gland, adrenal gland, pituitary gland and kidney were classified as continuous fenestrated, those from the liver as sinusoidal, and those from the brain cortex as continuous non-fenestrated. For Figure 3, cEC clusters were summarized into common and organ-specific states by calculating, for each Leiden cluster, the proportion of cells contributed by each organ; clusters in which ≥70% of cells originated from a single organ were designated as organ-specific (for example thyroid-, adrenal gland-, pituitary gland, kidney, brain- or liver–specific ECs), whereas clusters with substantial contributions from multiple organs—defined as clusters in which at least five organs each contributed ≥5% of cells—were classified as Common EC1 or Common EC2.

**Differential gene expression**

For single-cell analyses, differential gene expression was assessed using the rank_genes_groups function in Scanpy, configured to use the Wilcoxon rank-sum test. Resulting *P*-values were adjusted for multiple testing using the Benjamini–Hochberg procedure to control the false discovery rate (FDR).

**Pseudobulk differential expression analysis in capillary endothelial cells**

To identify both organ-specific and cEC subtype–specific transcriptional features of cECs, we performed differential gene expression analysis using a pseudobulk approach. In all analyses, raw gene counts were summed across cells within each pseudobulk sample, and differential expression was carried out using PyDESeq2 (v0.5.0), with a binary group variable as the design factor; Wald tests were used to assess differential expression, and *P*-values were adjusted using the Benjamini–Hochberg false discovery rate procedure.

For cEC subtype–resolved analysis (Supplementary Fig. 5; EC-conserved marker step), cECs were stratified into continuous fenestrated, continuous non-fenestrated, and sinusoidal capillaries. For each subtype, cells in the index subtype were randomly assigned to ten pseudobulk replicates, whereas cells from the other two subtypes were pooled and similarly partitioned into ten pseudobulk replicates as the reference. This procedure was repeated three times, once for each subtype as the index group. Genes meeting baseMean ≥ 10, adjusted *P*-value < 0.01, and log2 FC > 3 were used for downstream over-representation analysis (ORA) and for construction of the cEC subtype–resolved functional term network.

To identify gene programs commonly enriched in cECs across organs (Supplementary Fig. 7), cells were annotated as cEC or non-EC based on cell-type labels. Within each organ and group, cells were randomly assigned to one of ten pseudobulk replicates, and raw counts were summed across cells for each replicate. Differential expression was then performed between cEC and non-EC pseudobulks. Genes with baseMean ≥ 10, adjusted *P*-value < 0.05, and |log2 FC| > 2.5 were considered significant. For these genes, the mean expression and coefficient-of-variation inverse (*CV*-1, mean/SD) were computed separately in cEC and non-EC pseudobulks, and the difference in *CV*-1 (cEC minus non-EC) was used to prioritize genes showing stable enrichment across organs. Selected genes were visualized as a heatmap annotated by group and organ of origin.

For organ-resolved analysis (Fig. 4C), cECs were grouped by organ identity. For each organ of interest, cells were randomly assigned to ten pseudobulk replicates. cECs from all other organs were used as the reference condition, partitioned into pseudobulk replicates within each organ, and analyzed jointly as a pooled other-organs reference. Differential expression was performed between the organ of interest and the pooled reference. Genes enriched in non-ECs in the EC-conserved marker step (adjusted *P*-value < 0.05 and log2 FC < −2.5 for cEC versus non-EC) were removed. Among the remaining genes, those meeting baseMean ≥ 10, adjusted *P*-value < 0.05, and log2 FC > 0.585 in the organ-of-interest versus pooled reference comparison were ranked by log2 FC, and the top 125 were used as input for ORA.

**Over-representation analysis**

ORA was performed using the enrichr function implemented in GSEApy (v1.1.8). As input gene sets, we used lists of differentially expressed genes (DEGs) obtained either from pseudobulk differential expression analyses or from single-cell differential expression testing performed with Scanpy’s function (sc.tl.rank_genes_groups), depending on the specific comparison. For cEC types-focused analyses, enrichment analysis was performed using a curated collection of vascular-related gene sets 13. For organ- and histology-specific transcriptional programs in cECs, enrichment analysis was performed using the MSigDB hallmark and Gene Ontology Biological Process (GO BP) gene sets. Statistical significance was assessed using the hypergeometric test implemented in GSEApy, and *P-*values were adjusted for multiple testing using the Benjamini–Hochberg FDR correction.

**Consensus NMF (cNMF) parameters**

For cNMF, genes were restricted to the top 10 000 highly variable genes, and extreme values were controlled with a high-quantile threshold (quantile = 0.9999). The batch-corrected, HVG-restricted expression matrix was variance-normalized for cNMF input, and an additional library-size–normalized matrix (TP10K) was generated for downstream interpretation. Models were fit across K = 6–19, each with 20 random initializations (n_iter = 20), and K = 14 was selected from standard K-selection diagnostics balancing module stability and Frobenius reconstruction error. Inferred spectra were filtered with a local-density criterion (density_threshold = 0.01) before consensus aggregation, and low-support modules (fewer than 50 cells with that module as their highest usage score) were excluded. Final outputs included cell-wise program usage scores, consensus gene-weight spectra, and the top 100 genes per program ranked by module weights.

**Regulon network inference**

Putative transcription factor (TF)–target relationships were inferred from a loom-formatted single-cell expression matrix using GRNBoost2 (pyscenic grn) with the mouse TF list provided by pySCENIC (mm_mgi_tfs.txt). Co-expression modules were pruned into motif-supported regulons by cisTarget motif enrichment (pyscenic ctx) using mouse cisTarget databases (mm10) defined around transcription start sites with both promoter-proximal (500 bp upstream/100 bp downstream) and extended (10 kb upstream/10 kb downstream) search spaces, using the paired rankings and scores feather files (mm10_500bp_up_100bp_down_full_tx_v10_clust and mm10_10kbp_up_10kbp_down_full_tx_v10_clust). Regulon activity was quantified at single-cell resolution as AUCell AUC scores (pyscenic aucell), and regulon specificity scores (RSS) were computed from the AUCell matrix (regulon_specificity_scores) and ranked within each group.

**Organ-resolved functional term network**

Nodes represented enriched terms annotated with the size of the underlying gene union and the organ-specific contribution. Edges connected term pairs with non-zero gene-set overlap, weighted by the Jaccard index; edges with Jaccard < 0.05 were discarded and isolated nodes were excluded. A grid search over the Louvain resolution parameter (0.01–1.00, step 0.05) was performed, computing the weighted modularity Q at each resolution, and the partition that maximized modularity among solutions yielding six to eight modules was selected. Node positions were computed with a Kamada–Kawai layout using pairwise distances derived from Jaccard similarity, node size was scaled to gene-union size, and each node was rendered in Matplotlib as a multi-segment pie chart of organ contributions, with Louvain modules shown as colored rings and edge thickness proportional to the Jaccard weight (intra-module edges in the module color, inter-module edges in gray).

**Topological analysis of the functional module network**

**Betweenness centrality**

To quantify the topological importance of individual functional terms, we computed betweenness centrality on the organ-resolved functional term network using NetworkX (v3.4.2). For each term pair, gene-set overlap was summarized by the Jaccard coefficient *J*. For shortest-path–based centrality, similarity was converted to an edge length by defining

.

This value was stored as the “distance” attribute and supplied as the edge weight in the betweenness centrality calculation, such that shortest paths preferentially traversed edges assigned shorter distances, corresponding to higher gene-set similarity. Node-wise betweenness centrality was computed using the normalized NetworkX implementation (range 0–1), where higher values indicate more bridge-like positions in the functional term network.

**Within module degree z-score**

On the same organ-resolved functional network and Louvain partition, we quantified the relative intra-module connectivity of each term using the within-module degree z-score. Using the Jaccard similarity as the edge weight, we first computed, for each node, the intra-module strength as the sum of edge weights connecting that node to other nodes in the same Louvain module. Nodes without incident edges (isolates) were removed prior to this analysis. For each module , we then calculated the mean and standard deviation of across all nodes in that module and defined the within-module degree z-score for node as

In modules with zero variance in , z-scores were set to zero. This within-module degree z-score summarizes how strongly each functional term is connected within its own module relative to other terms in the same module, with higher values indicating more hub-like positions inside that module.

**Organ diversity and evenness of cell clusters**

For each cluster (Figure 2B), we counted the number of cells originating from each organ and converted these counts into organ-wise proportions across organs, such that

Shannon entropy was computed as

Shannon equitability was then defined as

yielding values between 0 and 1, with higher values indicating a more even contribution of organs to a given cluster. Organ diversity was additionally summarized using the Gini–Simpson index

which increases as the organ composition of a cluster becomes more diverse.

**Histological analyses**

The thyroid, adrenal gland, pituitary gland, kidney, liver, and brain cortex were fixed in 4% paraformaldehyde (PFA) for 20 min at room temperature (RT). Then, samples were dehydrated in 20% sucrose in PBS overnight at 4°C. Samples were embedded in tissue freezing media (Leica). Frozen blocks were cut into 20-μm sections. For immunofluorescence staining, the fixed samples were blocked with the premade blocking solution (Cell Signaling, 12411S) for 1 hour and incubated in primary antibodies (1:200 dilution) in blocking solution at 4°C overnight. After several washes, the samples were incubated in secondary antibodies (1:1000 dilution) in blocking solution at RT for 1 hour. Then, they were washed in PBS and mounted with mounting medium with DAPI (Vector Laboratories, H-1500-10).

Primary antibodies used for IF staining were as follows: hamster anti-CD31 monoclonal (Millipore, MAB1398Z), mouse anti-FOXP2 monoclonal (Thermo Fisher Scientific, MA5-31419), rabbit anti-LYVE1 monoclonal (AngioBio, #11-034), rat anti-BLIMP1 monoclonal (Thermo Fisher Scientific, 14-5963-82), rat anti-EMCN monoclonal (Thermo Fisher Scientific, 14-5851-82), mouse anti-SOX4 monoclonal (Thermo Fisher Scientific, MA5-31424), rabbit anti-NPR3 polyclonal (Thermo Fisher Scientific, PA5-85282), mouse anti-ABCA1 monoclonal (Thermo Fisher Scientific, MA-16026), mouse anti-MEIS1 monoclonal (Thermo Fisher Scientific, MA5-27191), rat anti-MRC1 monoclonal (Thermo Fisher Scientific, 17-2061-82), rabbit anti-c-MAF polyclonal (Thermo Fisher Scientific, PA5-23179), mouse anti-CXCL12 monoclonal(Thermo Fisher Scientific, MA-23759), and mouse anti-CLDN5 monoclonal (Thermo Fisher Scientific, 352588).. Secondary antibodies were Cy3-, fluorescein isothiocyanate (FITC)–, or Cy5-conjugated anti-hamster IgG, anti-rat IgG, anti-rabbit IgG, anti-mouse IgG, anti-human IgG, anti-sheep IgG, or anti-goat IgG (Jackson ImmunoResearch).
